# Supplementary material for: Investigation of real polarization resistance for electrode performance in proton-conducting electrolysis cells
Source: Royal Society of Chemistry journal article supplement (doi:10.1039/c8ta06862c), 2018-01-01
Supplement: c8ta06862c1.pdf [file c8ta06862c1.pdf]

## Supporting Information

### **Investigation of Real Polarization Resistance for Electrode Performance in Proton-Conducting Electrolysis Cells**

Daoming Huan<sup>a</sup>, Wanhua Wang<sup>a</sup>, Yun Xie<sup>a</sup>, Nai Shi<sup>a</sup>, Yanhong Wan<sup>a</sup>, Changrong

Xia<sup>a</sup>, Ranran Peng<sup>\*a,b,c</sup>, Yalin Lu<sup>\*a,b,c,d</sup>

<sup>a</sup> CAS Key Laboratory of Materials for Energy Conversion, Department of Materials Science and Engineering, University of Science and Technology of China, Hefei, 230026 Anhui, China.

<sup>b</sup> Synergetic Innovation Center of Quantum Information & Quantum Physics, University of Science and Technology of China, Hefei, Anhui 230026, China.

<sup>c</sup> Hefei National Laboratory of Physical Science at the Microscale, University of Science and Technology of China, Hefei, 230026 Anhui, China.

<sup>d</sup> National Synchrotron Radiation Laboratory, University of Science and Technology of China, Hefei 230026, P. R. China.

\* Corresponding author: E-mail: pengrr@ustc.edu.cn yllu@ustc.edu.cn

## Working mechanism of a PCEC

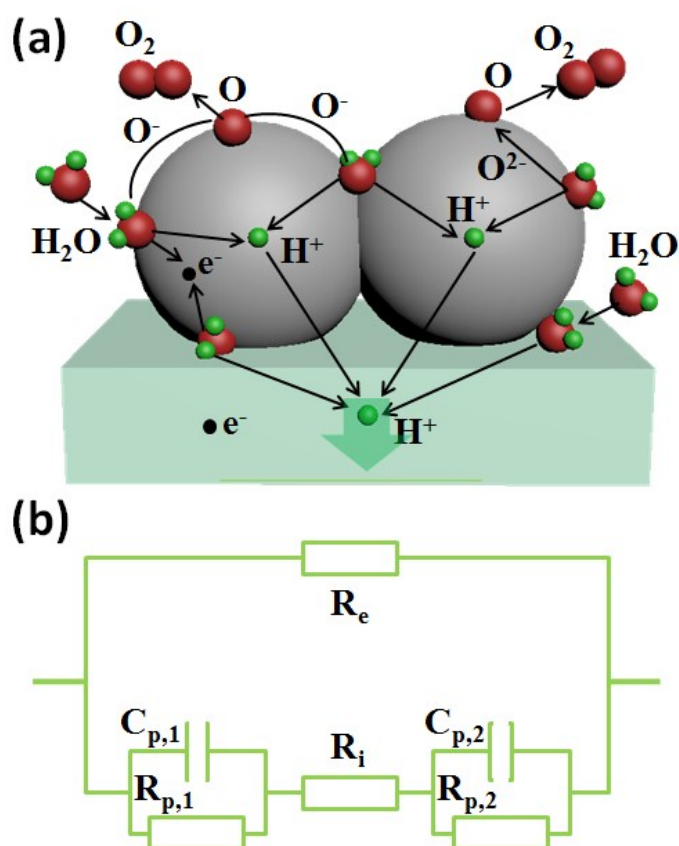

Figure S1. (a) The working mechanism of single phase air electrode with simultaneous proton, oxygen and electron conduction for PCECs. (b) Simplified equivalent circuit of a solid-state cell based on an electrolyte of MIECs.

## Electrical conductivity of SLF samples

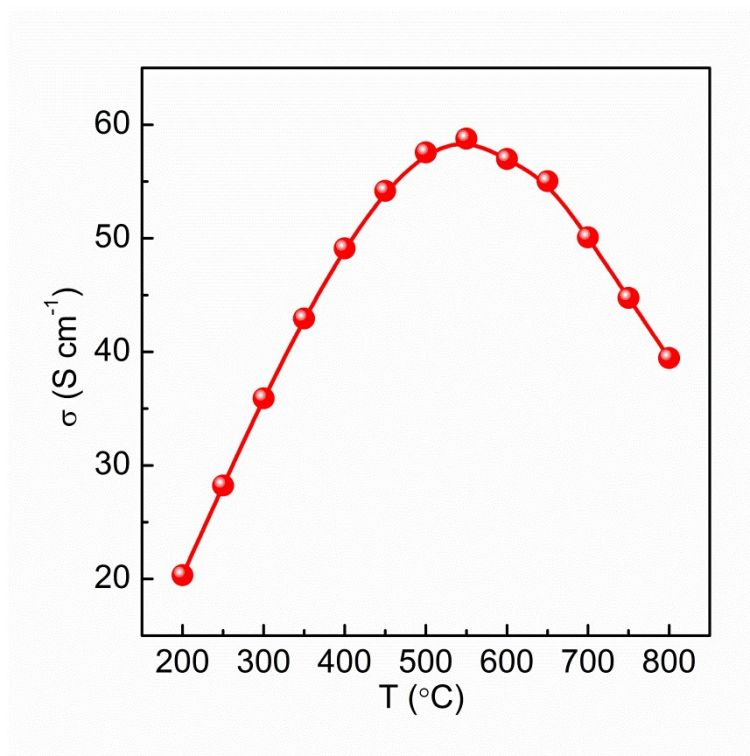

Figure S2. Electrical conductivities of SLF measured at various temperatures.

Figure S2 shows the total conductivity of SLF at various temperatures. The conductivities of SLF are 57.6, 58.8, 57.0, 55.0 and 50.1  $\text{Scm}^{-1}$  at 500, 550, 600, 650 and 700  $^{\circ}\text{C}$ , respectively. The conductivity increases first with the temperature increasing and then decreases, achieves the highest value of 58.8  $\text{Scm}^{-1}$  at 550 $^{\circ}\text{C}$ . The undoped  $\text{Sr}_3\text{Fe}_2\text{O}_7$  achieves the maximum conductivity of 60  $\text{Scm}^{-1}$  at 500 $^{\circ}\text{C}$  with the same relationship of conductivity with temperature. This doping concentration of La in  $\text{Sr}_3\text{Fe}_2\text{O}_7$  has little negative effect on the conducting property because of the higher oxidation of  $\text{La}^{3+}$  than  $\text{Sr}^{2+}$  lead to less oxygen vacancy. (S1, S2)

## Electrochemical impedance spectra (EIS) of button cells

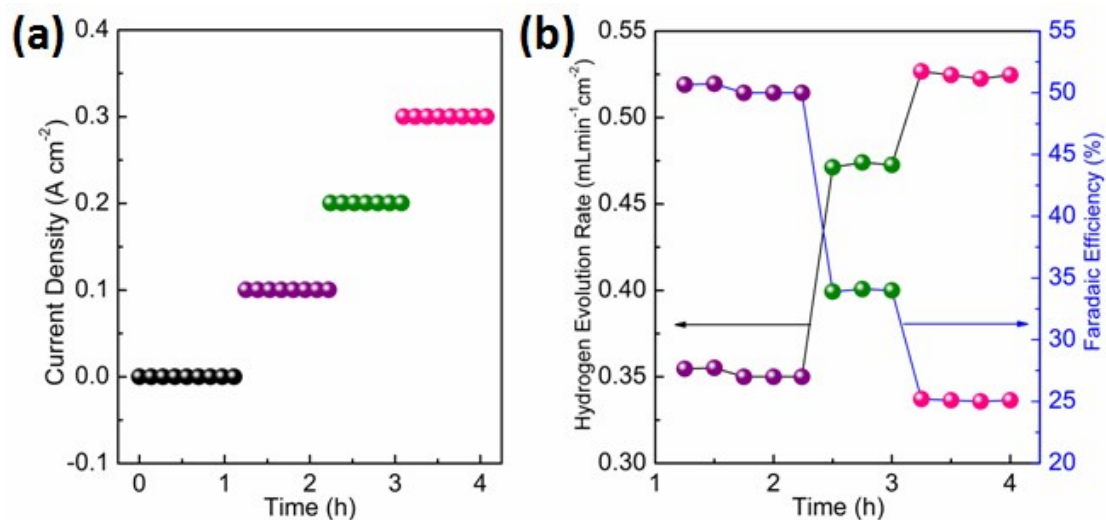

Figure S3. (a) Short-term stability test at various electrolysis current densities and (b) the corresponding hydrogen evolution rate and Faradaic efficiency at 700 °C.

Faradaic efficiency has been determined with 30 % H<sub>2</sub>-N<sub>2</sub> and 20 % H<sub>2</sub>O-air injected into cathode and anode, respectively. After the electrolysis current achieve stable for 1 h, the actual hydrogen evolution rates can be measured, which are 0.351, 0.473 and 0.525 ml min<sup>-1</sup> cm<sup>-2</sup> at 100, 200 and 300 mA cm<sup>-2</sup>, respectively. When the Faradaic efficiency is 100 %, hydrogen evolution rates can be theoretically calculated as 0.70, 1.39 and 2.09 ml min<sup>-1</sup> cm<sup>-2</sup> at 100, 200 and 300 mA cm<sup>-2</sup>, respectively. And therefore, the actual Faradaic efficiencies of electrolysis during the stability test can be estimated as 50.2 , 34.0 and 25.1 % at current densities of 0.1, 0.2 and 0.3 Acm<sup>-2</sup>. (S3)

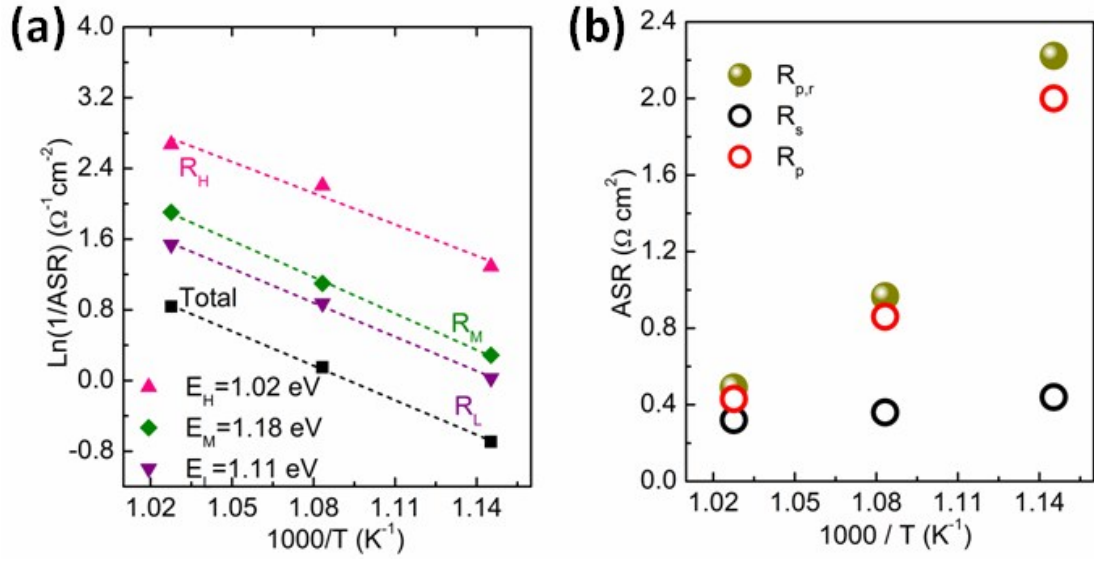

Figure S4. (a) Temperature dependence of apparent polarization resistances:  $R_H$ ,  $R_M$ ,  $R_L$  and  $R_p$  (Total,  $R_H+R_M+R_L$ ). (b)  $R_s$ ,  $R_p$  and  $R_{p,r}$  for PCEC single cell using the SLF air electrode measured under OCV condition.

Table S1. The values for each sub-step of  $R_H$ ,  $R_M$ , and  $R_L$  and ratios of  $R_i/R_{i,r}$  ( $i=H, M, L$ ) at various temperatures under OCV condition humid  $H_2/20\% H_2O$ -air atmosphere.

| Temperature (°C) | $R_H$<br>( $\Omega cm^2$ ) | $R_H/R_{H,r}$ | $R_M$<br>( $\Omega cm^2$ ) | $R_M/R_{M,r}$ | $R_L$<br>( $\Omega cm^2$ ) | $R_H/R_{L,r}$ | $R_p$<br>( $\Omega cm^2$ ) |
|------------------|----------------------------|---------------|----------------------------|---------------|----------------------------|---------------|----------------------------|
| 700              | 0.069                      | 0.846         | 0.149                      | 0.873         | 0.215                      | 0.892         | 0.433                      |
| 650              | 0.110                      | 0.853         | 0.333                      | 0.887         | 0.418                      | 0.903         | 0.861                      |
| 600              | 0.275                      | 0.866         | 0.751                      | 0.900         | 0.975                      | 0.910         | 2.001                      |

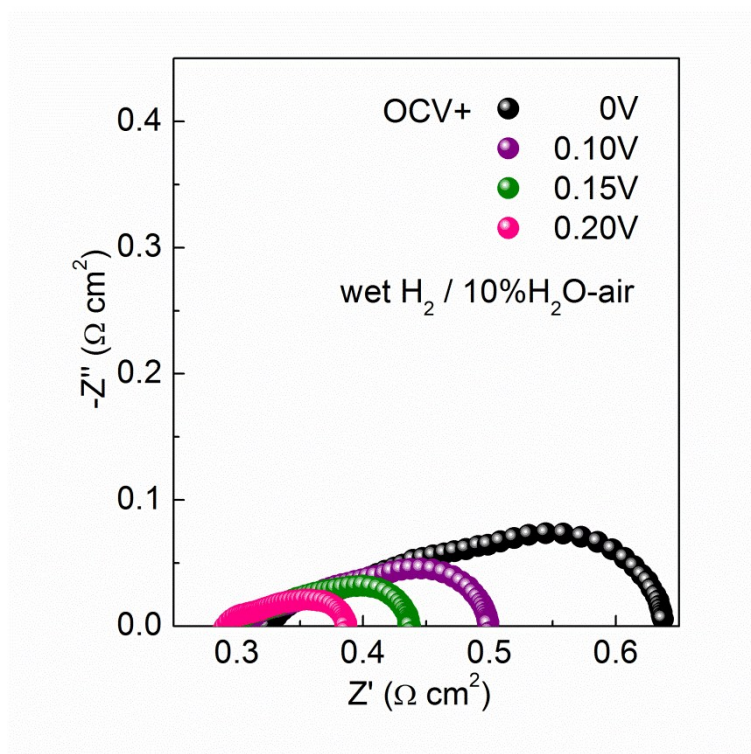

Figure S5. EIS of the PCEC single cell using the SLF air electrode measured at various electrolysis voltages (OCV+ 0.00V, 0.10V, 0.15V, 0.20V) in humid H<sub>2</sub>/ 10% H<sub>2</sub>O-air atmosphere at 700 °C.

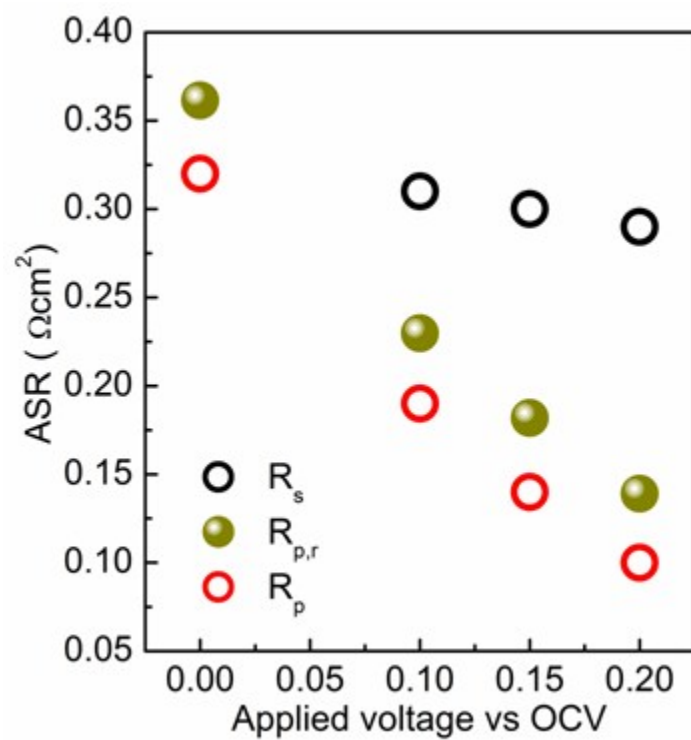

Figure S6. (a)  $R_s$ ,  $R_p$  and  $R_{p,r}$  for a PCEC using the SLF anode.



Table S2. Values of  $R_H$ ,  $R_M$ , and  $R_L$  under various electrolysis voltage in humid  $H_2$ /10%  $H_2O$ -air atmosphere.

| Applied voltage vs OCV<br>(V) | $R_H$ ( $\Omega cm^2$ ) | $R_M$ ( $\Omega cm^2$ ) | $R_L$ ( $\Omega cm^2$ ) | $R_p$ ( $\Omega cm^2$ ) |
|-------------------------------|-------------------------|-------------------------|-------------------------|-------------------------|
| 0.00                          | 0.064                   | 0.116                   | 0.138                   | 0.318                   |
| 0.10                          | 0.036                   | 0.079                   | 0.076                   | 0.191                   |
| 0.15                          | 0.030                   | 0.063                   | 0.048                   | 0.141                   |
| 0.20                          | 0.023                   | 0.047                   | 0.026                   | 0.096                   |

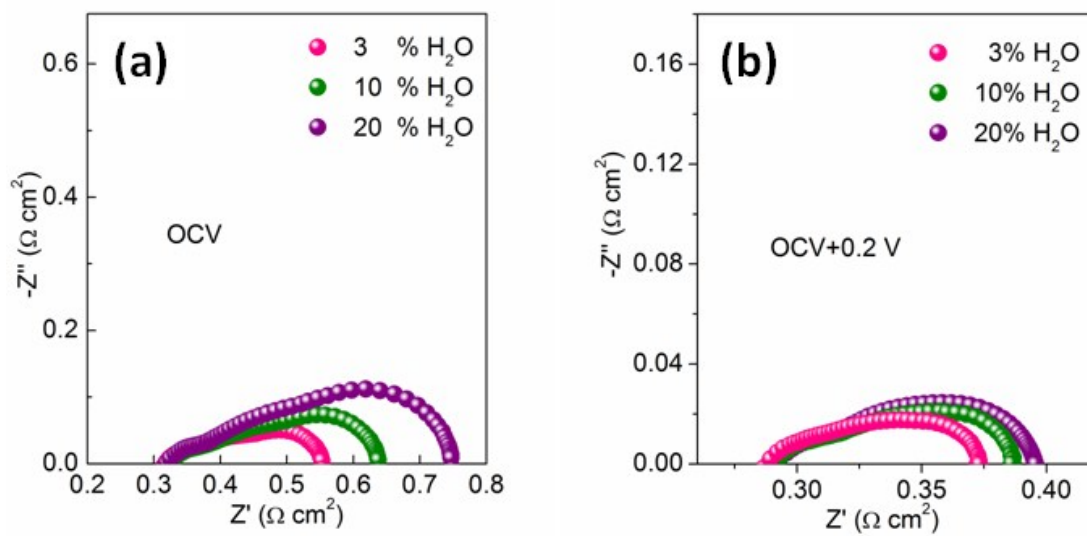

Figure S7. EIS of the PCEC single cell using the SLF air electrode measured in various  $\text{pH}_2\text{O}$  under (a) OCV and (b) OCV +0.20 V condition in wet  $\text{H}_2$ / 10%  $\text{H}_2\text{O}$ -air atmosphere at 700  $^\circ\text{C}$ .

Table S3. Values of  $R_H$ ,  $R_M$  and  $R_L$  in various  $pH_2O$  under OCV and OCV+0.20 V modes.

|          | $pH_2O$ (atm) | $R_H$ ( $\Omega cm^2$ ) | $R_M$ ( $\Omega cm^2$ ) | $R_L$<br>( $\Omega cm^2$ ) | $R_p$ ( $\Omega cm^2$ ) |
|----------|---------------|-------------------------|-------------------------|----------------------------|-------------------------|
| OCV      | 0.03          | 0.046                   | 0.098                   | 0.094                      | 0.238                   |
|          | 0.10          | 0.064                   | 0.116                   | 0.138                      | 0.318                   |
|          | 0.20          | 0.069                   | 0.149                   | 0.215                      | 0.433                   |
| OCV+0.2V | 0.03          | 0.022                   | 0.044                   | 0.020                      | 0.086                   |
|          | 0.10          | 0.023                   | 0.047                   | 0.026                      | 0.096                   |
|          | 0.20          | 0.025                   | 0.051                   | 0.029                      | 0.105                   |

## Reference

- S1. Z. Wang, W. Yang, S. P. Shafi, L. Bi, Z. Wang, R. Peng, C. Xia, W. Liu and Y. Lu, *J. Mater. Chem. A*, 2015, **3**, 8405-8412.
- S2. D. Huan, Z. Wang, Z. Wang, R. Peng, C. Xia and Y. Lu, *ACS Appl. Mater. Interfaces*, 2016, **8**, 4592–4599.
- S3. S. M. Babiniec, R. Sandrine and N. P. Sullivan, *Int. J. Hydrogen Energy*, 2015, **40**, 9278-9286.
